# Supplementary material
Source: Research Square preprint supplement (doi:10.21203/rs.3.rs-8881110/v1)
Supplement: Supplementary file 2 [file 13f5c2b3c9a45ce4cbfa3f8f.xlsx]

## Sheet: Sheet1
province	incidence rate of myopia among primary school students in 2021（%）	rank of myopia rate	total GDP in 2021 (billion CNY)	rank of total GDP	GDP per capita in 2021 (CNY)	rank of GDP per capita	economic ranking		stratum 1-incidence of myopia (stratified with an average of 35.0%. i.e. provinces with a myopia rate ≤35.0% is categorized as "low (myopia incidence)", while provinces with a myopia rate >35.0 is categorized as "high (myopia incidence)")	stratum 2-economic level (provinces ranking below 14 are stratified as "low")
Beijing	38.7	11	4061	12	185773	1	5	13	high	high
Tianjin	35.7	17	1569.5	24	100480	6	15	30	high	low
Hebei	39.4	9	4039.1	13	54210	28	22	41	high	low
Shanxi	45.8	1	2259	21	64710	17	19	38	high	low
Inner Mongolia	42.3	4	2320.2	20	96460	8	13	28	high	high
Liaoning	38.8	10	2712.4	18	63760	21	20	39	high	low
Jilin	41.7	5	1406.7	26	58350	25	27	51	high	low
Heilongjiang	42.4	3	1480	25	38602	31	29	56	high	low
Shanghai	39.8	7	4321.4	9	173750	2	4	11	high	high
Jiangsu	43.2	2	11636.4	2	137306	3	1	5	high	high
Zhejiang	36.1	15	7351.6	4	128150	4	2	8	high	high
Anhui	36	16	4295.9	10	70410	14	9	24	high	high
Fujian	37.1	14	4390.3	8	110000	5	5	13	high	high
Jiangxi	28.4	26	2961.9	15	65980	16	16	31	low	low
Shandong	39.5	8	8309.5	3	81800	11	7	14	high	high
Henan	38.4	12	5807.4	5	58430	24	14	29	high	high
Hubei	32	21	5001.2	7	86550	10	8	17	low	high
Hunan	28.3	27	4239.4	11	63850	20	16	31	low	low
Guangdong	34.6	18	12436.9	1	98700	7	2	8	low	high
Guangxi	32	21	2474	19	50230	29	25	48	low	low
Hainan	21.9	31	644	28	64340	19	24	47	low	low
Chongqing	31.7	24	2787.2	16	89840	9	11	25	low	high
Sichuan	33.9	19	5385	6	64380	18	9	24	low	high
Guizhou	25.7	29	1958.6	22	56260	27	26	49	low	low
Yunnan	31.7	24	2748.1	17	58950	23	21	40	low	low
Xizang	22.3	30	190	31	61700	22	28	53	low	low
Shaanxi	37.9	13	2984.4	14	75500	12	12	26	high	high
Gansu	40.3	6	1036.2	27	40570	30	31	57	high	low
Qinghai	32	21	334	30	58300	26	29	56	low	low
Ningxia	32.1	20	452.2	29	70000	15	23	44	low	low
Xinjiang	25.8	28	1598.3	23	71590	13	18	36	low	low

## Sheet: Sheet2
省份	GDP总量（亿元）	人均GDP（元）		省份/直辖市	近视率（%）	近视率排名			省份/直辖市	总GDP（亿元）	总GDP排名		省份/直辖市	人均GDP（元）	人均GDP排名			原始数据	排序后的序号
全国	1143670	80976		北京	38.7	23			北京	4061	10		北京	185773	1			11	3
北京	40610	185773		天津	35.7	30			天津	1569.5	29		天津	100480	14			35	13
天津	15695	100480		河北	39.4	24			河北	4039.1	15		河北	54210	26			42	17
河北	40391	54210		山西	45.8	28			山西	2259	28		山西	64710	24			44	19
山西	22590	64710		内蒙古	42.3	25			内蒙古	2320.2	27		内蒙古	96460	18			35	13
内蒙古	23202	96460		辽宁	38.8	22			辽宁	2712.4	14		辽宁	63760	10			29	15
辽宁	27124	63760		吉林	41.7	26			吉林	1406.7	16		吉林	58350	17			42	17
吉林	14067	58350		黑龙江	42.4	27			黑龙江	1480	17		黑龙江	38602	27			47	22
黑龙江	14800	38602		上海	39.8	29			上海	4321	9		上海	173750	2			11	3
上海	43214	173750		江苏	43.2	19			江苏	11636	2		江苏	137306	3			5	1
江苏	116364	137306		浙江	36.1	18			浙江	7351.6	4		浙江	128150	5			9	2
浙江	73516	128150		安徽	36	17			安徽	4295.9	11		安徽	70410	19			24	11
安徽	42959	70410		福建	37.1	14			福建	4390.3	8		福建	110000	4			12	4
福建	43903	110000		江西	28.4	12			江西	2961.9	18		江西	65980	16			35	13
江西	29619	65980		山东	39.5	20			山东	8309.5	3		山东	81800	13			14	5
山东	83095	81800		河南	38.4	21			河南	5807.4	5		河南	58430	25			29	15
河南	58074	58430		湖北	32	8			湖北	5001	7		湖北	86550	12			17	7
湖北	50012	86550		湖南	28.3	5			湖南	4239	12		湖南	63850	15			26	16
湖南	42394	63850		广东	34.6	15			广东	12436.9	1		广东	98700	6			8	2
广东	124369	98700		广西	32	6			广西	2474	19		广西	50230	28			48	23
广西	24740	50230		海南	21.9	1			海南	644	21		海南	64340	18			42	17
海南	6440	64340		重庆	31.7	7			重庆	2787.2	13		重庆	89840	11			22	10
重庆	27872	89840		四川	33.9	16			四川	5385	6		四川	64380	18			24	11
四川	53850	64380		贵州	25.7	3			贵州	1958.6	20		贵州	56260	20			48	23
贵州	19586	56260		云南	31.7	11			云南	2748.1	19		云南	58950	22			41	18
云南	27481	58950		西藏	22.3	2			西藏	190	22		西藏	61700	17			45	20
西藏	1900	61700		陕西	37.9	13			陕西	2984.4	14		陕西	75500	13			26	16
陕西	29844	75500		甘肃	40.3	31			甘肃	1036.2	23		甘肃	40570	27			54	24
甘肃	10362	40570		青海	32	9			青海	334	24		青海	58300	23			49	21
青海	3340	58300		宁夏	32.1	10			宁夏	452.2	25		宁夏		21			45	20
宁夏	4522	70000		新疆	25.8	4			新疆	1598.3	26		新疆		22			45	20
新疆	15983	71590
