# Supplementary material
Source: Research Square preprint supplement (doi:10.21203/rs.3.rs-8881110/v1)
Supplement: Supplementary file 2 [file 891ffd65b5f8ce96427ed9fb.docx]

**Informed Consent Form**

**Purpose of the Study:**

The purpose of this study is to evaluate the effectiveness of myopia prevention and control measures and their potential adverse reactions, to provide a scientific basis for future prevention and control strategies.

**Participation Method:**

You will be invited to complete a questionnaire that will collect information on your knowledge, attitudes, and actual use of myopia prevention and control measures.

**Informed Consent:**

1. Your participation is entirely voluntary. You have the right to withdraw from this study at any time without any form of punishment or adverse impact.

2. Your personal information will be strictly confidential, and all data will be used solely for the purposes of this study.

3. All information you provide will be anonymized and will not be linked to your personal identity.

4. You will not receive any form of compensation for participating in this study.

5. If you have any questions or require further information, you may contact us through the following means: +86 13811600332/+86 18811685801.

**Privacy Protection:**

We assure you that each questionnaire is filled out anonymously, and we will do our utmost to protect your personal privacy.

I have read this informed consent form and agree to participate in this study. I understand that I can withdraw from the study at any time during the research period without any reason.

Signature:

**In which region is your child studying?**

Beijing, Xiamen, Chengdu, Xi’an, Changsha, Nanjing, Taiyuan, Dalian

**Are you and your child permanent residents of the local area (residing >6 months)?**

Yes No【If no, the questionnaire ends here】

**Is your child nearsighted?** Yes No

**Is your child currently using or has your child previously used the following myopia intervention methods?** 0.01% atropine eye drops, spectacles, contact lenses【For guardians of myopic children only】

**What is your gender?**

Male, Female

**What is your age?**

19-34 years old, 35-49 years old, 50-64 years old, Over 65 years old

**Where do you reside?**

Urban resident, Rural resident

**What is your medical insurance status?**

Social Basic Medical Insurance, Commercial Insurance, Self-funded Medical Care, Public-funded Medical Care, Other

**What is your level of education?**

Postgraduate, Bachelor's, Associate's, Vocational High School or High School, Junior High School, Elementary School

**What is your employment status?**

Employed, Retired, Unemployed

**What is your occupation?**

Factory Worker, Healthcare Institution, Freelancer, Company Employee, Teacher, Student, Unemployed, Government Official, Business Management, Other

**Q1 Knowledge of Myopia Prevention and Control**

**Each of the following questions contains views and opinions on knowledge related to myopia prevention and control. Do you agree with these views? (Score 1-5 from "completely unclear" to "completely clear")**

1. You are aware that myopia is related to genetics, and children with both parents being nearsighted are more likely to develop myopia compared to those with only one nearsighted parent or neither parent being nearsighted.
2. Prolonged near work (＞45 minutes) and close reading distance (＜33 centimeters) are risk factors for myopia.
3. Lack of outdoor activities is a risk factor for myopia.
4. Poor reading and writing habits, such as tilting the head while writing or having the fingertips close to the pen tip, are risk factors for myopia.
5. Reading and writing in environments with excessively dark or bright lighting is a risk factor for myopia.
6. Eye exercises can help delay the onset and progression of myopia.
7. The onset of myopia typically occurs between the ages of 6-8 and persists until 15-16 years old.
8. You are aware that atropine eye drops can delay the progression of myopia.
9. You are aware that spectacles (single vision, bifocal, progressive multifocal lenses, etc.) can delay the progression of myopia.
10. You are aware that orthokeratology lenses (OK lenses) can delay the progression of myopia.

**A. Sub-questionnaire on the Use of Atropine Eye Drops**

**Q1 Knowledge of Atropine Eye Drops**

**Each of the following questions contains views and opinions on knowledge related to 0.01% low-concentration atropine eye drops. Are you aware of these views? (Score 1-5 from "completely unclear" to "completely clear")**

1. The adverse reactions of atropine are concentration-dependent, with higher concentrations leading to a higher incidence of adverse reactions.
2. 0.01% atropine eye drops have a good effect on delaying myopia progression.
3. 0.01% atropine eye drops have a cumulative effect on myopia control, with clinical trials showing continued effects on axial length changes and myopia progression even after 4-5 years.
4. The ocular adverse reactions of 0.01% atropine eye drops will gradually be tolerated with extended use.
5. 0.01% atropine eye drops can cause ocular adverse reactions such as dilated pupils, photophobia, increased intraocular pressure, reduced accommodation ability and near vision loss (difficulty seeing near objects), allergies, and ocular irritation (such as stinging discomfort).
6. The reported age range for users of 0.01% atropine eye drops in the literature is 4 to 16 years old.
7. 0.01% atropine eye drops are suitable for individuals with myopia exceeding 50 degrees or an annual increase of over 50 degrees.
8. The following groups are prohibited from using 0.01% atropine eye drops: patients allergic to belladonna components, patients with glaucoma or a tendency towards glaucoma (shallow anterior chamber, narrow angle), patients with a history of head trauma, patients with heart disease (especially arrhythmia, congestive heart failure, coronary heart disease, mitral stenosis), individuals with low accommodation ability, and patients with albinism.
9. The recommended use of 0.01% atropine eye drops is once before bedtime, one drop each time.
10. Effectiveness of 0.01% atropine eye drops means an annual increase in myopia of no more than 25 degrees or a reduction of at least 50% in the annual increase in myopia compared to before.
11. Follow-up is needed 1 to 2 weeks after starting low-concentration atropine, and then every 3 months.
12. Continuous use of 0.01% atropine eye drops for 2 to 3 years is effective and safe.
13. Atropine eye drops will cause a certain degree of myopia rebound after discontinuation. The lower the concentration of atropine eye drops, the smaller the rebound effect. Therefore, low-concentration atropine eye drops show the lowest rebound effect. The older the age of discontinuation, the smaller the myopia rebound effect. The slower the myopia progression during medication, the smaller the myopia rebound effect after discontinuation. The higher the myopia degree and the longer the axial length before medication, the smaller the myopia rebound effect after discontinuation.

**Q2 Positive Attitude Towards Medication**

**Each of the following questions involves positive attitudes and views on the treatment with 0.01% atropine eye drops. Please score each statement according to your degree of agreement. (Score 1-5 from "strongly disagree" to "strongly agree")**

1. I believe that the effect of 0.01% atropine eye drops is better than that of spectacles and orthokeratology lenses.
2. I never worry about the side effects of 0.01% atropine eye drops during the treatment course.
3. I think the current dosage frequency and concentration of atropine eye drops prescribed by the doctor are suitable for my child.
4. I do not believe that my child's myopia can be effectively controlled with 0.01% atropine eye drops.
5. Among possible medical options, I am unwilling to recommend 0.01% atropine eye drops to other parents of children with myopia.

**Q3 Medication-Related Behavior**

**The following describes some behaviors in the process of using 0.01% atropine eye drops with your child. Please circle the frequency of these behaviors. (Score 1-5 from "never" to "always")**

1. Increasing the dosage or frequency of medication on their own to enhance efficacy or when myopia worsens.
2. Not administering the medication according to the recommended usage time of 0.01% atropine eye drops.
3. Changing the medication or other myopia control methods on their own after a few days if they feel it is ineffective.
4. Reducing the dosage or stopping the medication on their own after myopia improves.
5. Transferring 0.01% atropine eye drops to other children with myopia.

**Q4 Sources of Information**

**If you have been exposed to the various forms of knowledge about 0.01% low-concentration atropine eye drops mentioned above, what is your view on the necessity of conducting these activities? (Score 1-5 from "extremely unnecessary" to "extremely necessary", for channels you are completely unaware of, please select number 3)**

1. Education during doctor's outpatient visits
2. Popular science during school vision checks
3. Recommendations from relatives and friends
4. Promotional materials distributed by community residents' committees
5. Obtained through media, internet, and other channels

**B. Sub-questionnaire on the Use of Spectacles**

**Q1 Knowledge of Spectacles**

**Each of the following questions contains views and opinions on knowledge related to spectacles. Are you aware of these views? (Score 1-5 from "completely unclear" to "completely clear")**

1. Spectacles are the simplest and safest tool for correcting myopia.
2. For children with myopia, a review should be conducted at least once every six months.
3. Over-correction when fitting spectacles can lead to excessive accommodation, which may exacerbate myopia progression.
4. Single-vision lenses are the most common type of spectacles.
5. Special optical design spectacles (such as bifocal lenses, progressive multifocal lenses, etc.) can also be used for myopia correction, especially for children with rapid myopia progression, offering some control effects.
6. Anisometropia and amblyopia are not recommended to be corrected with spectacles.
7. Patients with manifest strabismus or intermittent exotropia, and those with abnormal binocular vision, require further analysis and judgment by a clinical physician to determine whether spectacles are suitable.
8. If experiencing blurred vision or deformed frames while wearing spectacles, a follow-up visit should be made at any time.

**Q2 Positive Attitude Towards Using Spectacles**

**Each of the following questions involves positive attitudes and views on the treatment with spectacles. Please score each statement according to your degree of agreement. (Score 1-5 from "strongly disagree" to "strongly agree")**

1. I believe that the effect of spectacles is better than that of 0.01% atropine eye drops and orthokeratology lenses.
2. I am very worried about the side effects of spectacles.
3. I think spectacles are currently suitable for my child.
4. I believe that my child's myopia can be effectively controlled through wearing spectacles.
5. I do not think it is necessary to have a follow-up check every 3-6 months to confirm whether the spectacles' prescription is still suitable for my child.
6. I am willing to recommend spectacles to other parents of children with myopia.
7. I would purchase spectacles based on my own experience or advertising promotions.

**Q3 Behavior Related to Wearing Spectacles**

**The following describes some behaviors in the process of your child wearing spectacles. Please circle the frequency of these behaviors. (Score 1-5 from "never" to "always")**

1. Daily wearing time: score 1-5 respectively represent “Less than 2 hours”, “2-4h”, “4-8h”, “8-12h”, “More than 12 hours”
2. Have a follow-up check every six months
3. The corrected vision with spectacles reaches 1.0

**Q4 Sources of Information**

**If you have been exposed to the various forms of knowledge about spectacles mentioned above, what is your view on the necessity of conducting these activities? (Score 1-5 from "extremely unnecessary" to "extremely necessary", for channels you are completely unaware of, please select number 3)**

1. Education during doctor's outpatient visits
2. Popular science during school vision checks
3. Recommendations from relatives and friends
4. Promotional materials distributed by community residents' committees
5. Obtained through media, internet, and other channels

**C. Sub-questionnaire on the Use of Contact Lenses**

**Q1 Knowledge of Contact Lenses**

**Each of the following questions contains views and opinions on knowledge related to multifocal soft contact lenses and orthokeratology lenses (commonly known as OK lenses). Do you agree with these views? (Score 1-5 from "completely unclear" to "completely clear")**

1. Multifocal soft contact lenses can be used for myopia correction.
2. Multifocal soft contact lenses can delay myopia progression in children to a certain extent.
3. Multifocal soft contact lenses require long-term wear (more than 7 hours per day).
4. Orthokeratology lenses (commonly known as OK lenses) can be used for myopia correction.
5. Long-term wear of OK lenses can delay the progression of axial length in teenagers.
6. The principle of OK lenses is to flatten the central corneal curvature within a certain range through long-term wear, thereby temporarily reducing myopia degree.
7. OK lenses are suitable for patients whose myopia degree and astigmatism are within the specified range. For cases with higher refractive errors, experienced clinicians should make the fitting decision.
8. Compared to spectacles, OK lenses are more suitable for younger children with myopia because the younger the child, the faster the axial length growth. OK lenses can reduce the rate of axial length increase.
9. Follow-up checks are required for wearing OK lenses, including 1 day, 4-7 days, 1 month, 3 months, and 6 months after wearing.
10. When wearing contact lenses, attention should be paid to the risk of infection, corneal epithelial damage, and conjunctivitis caused by factors such as unclean handling and improper care after wearing.

**Q2 Positive Attitude Towards Using Contact Lenses**

**Each of the following questions involves positive attitudes and views on the treatment with contact lenses. Please score each statement according to your degree of agreement. (Score 1-5 from "strongly disagree" to "strongly agree")**

1. Believe that the effect of contact lenses is better than that of 0.01% atropine eye drops and spectacles.
2. Never worry about the side effects of contact lenses.
3. Think that contact lenses are currently suitable for children.
4. Believe that myopia can be effectively controlled through wearing contact lenses.
5. Willing to recommend contact lenses to other parents of children with myopia.
6. Purchase contact lenses based on personal experience or advertising promotions.

**Q3 Behavior Related to Wearing Contact Lenses**

**The following describes some behaviors in the process of your child wearing contact lenses. Please circle the frequency of these behaviors. (Score 1-5 from "never" to "always")**

1. Daily wearing time: score 1-5 respectively represent “Less than 4 hours”, “4-6h”, “6-8h”, “8-10h”, “More than 10 hours”
2. Follow up strictly according to the doctor's required time
3. Strictly pay attention to hand hygiene and contact lens cleaning before wearing contact lenses
4. Pay attention to eye care after wearing contact lenses, such as using eye drops

**Q4 Sources of Information**

**If you have been exposed to the various forms of knowledge about contact lenses mentioned above, what is your view on the necessity of conducting these activities? (Score 1-5 from "extremely unnecessary" to "extremely necessary", for channels you are completely unaware of, please select number 3)**

1. Education during doctor's outpatient visits
2. Popular science during school vision checks
3. Recommendations from relatives and friends
4. Promotional materials distributed by community residents' committees
5. Obtained through media, internet, and other channels
